# Supplementary material
Source: bioRxiv or medRxiv preprint supplement (https://www.biorxiv.org/highwire/filestream/121246/field_highwire_adjunct_files/0/400507-1.pdf)
Supplement: Supplementary file [file 400507-1.pdf]

BIOLOGICAL SCIENCES  
Plant Biology

## Precise translocation and duplication using CRISPR-Cas9 in *Arabidopsis thaliana*

Authors: Peter G. Lynagh<sup>1</sup>, Soichi Inagaki<sup>1,2</sup>, Kirk R. Amundson<sup>1</sup>, Mohan P.A. Marimuthu<sup>1</sup>, Brett Randolph Pike<sup>1</sup>, Isabelle M. Henry<sup>1</sup>, Ek Han Tan<sup>1,3</sup> and Luca Comai<sup>1</sup>

UC Davis Genome Center and Department of Plant Biology, Davis, California<sup>1</sup>  
National Institute of Genetics, Mishima, Japan<sup>2</sup>  
School of Biology and Ecology, University of Maine, Orono, Maine<sup>3</sup>

Corresponding Author: Luca Comai

### Author Contributions:

P.G.L., S.I., K.R.A., B.R.P. and E.H.T. developed genetic constructs. M.P.A.M. designed and conducted the fluorescent microscopy experiment and localized RPS5A-tD Tomato expression. P.G.L., S.I., I.M.H. and E.H.T. genotyped plants. P.G.L., S.I. and E.H.T. phenotyped plants. P.G.L. conducted the translocation and duplication experiments. P.G.L., I.M.H. and L.C. designed most of the research, analyzed data and wrote the paper.

Keywords: Plant, Arabidopsis, CRISPR, Genome, Recombination, NHEJ, Translocation, Duplication

# Supplementary Information

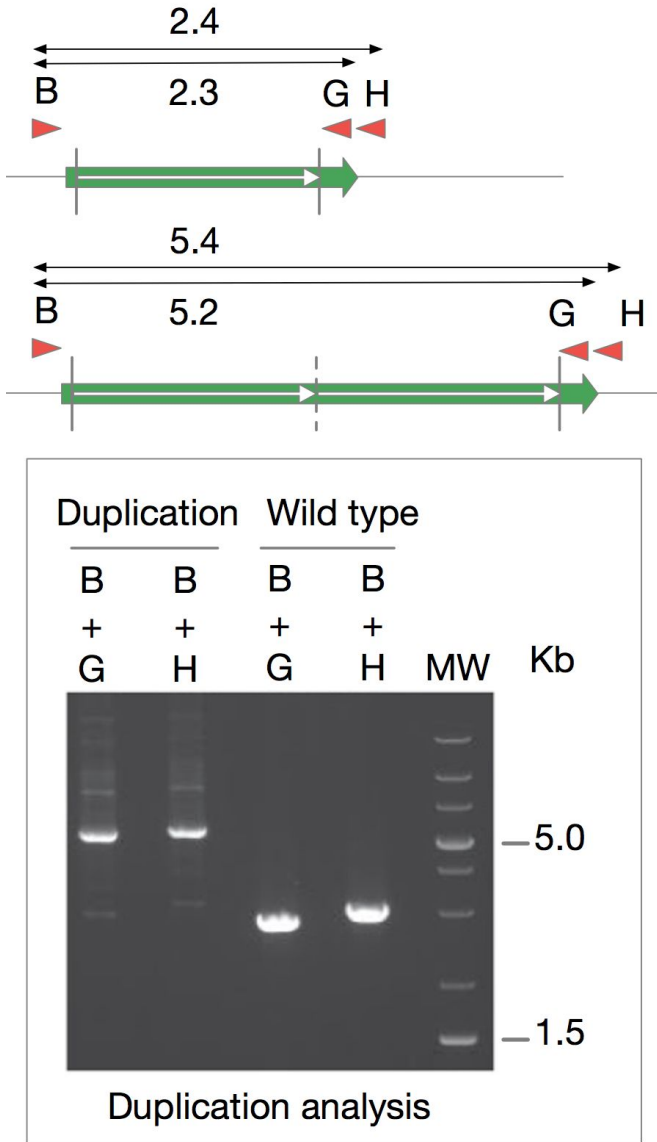

Figure S1. PCR for CH1 tandem duplication was performed using two combinations of primers (B + G and B + H). Using leaf DNA from T2 plant #9 from T1 plant #24 as a template yields bands that suggest a duplication of the targeted segment.

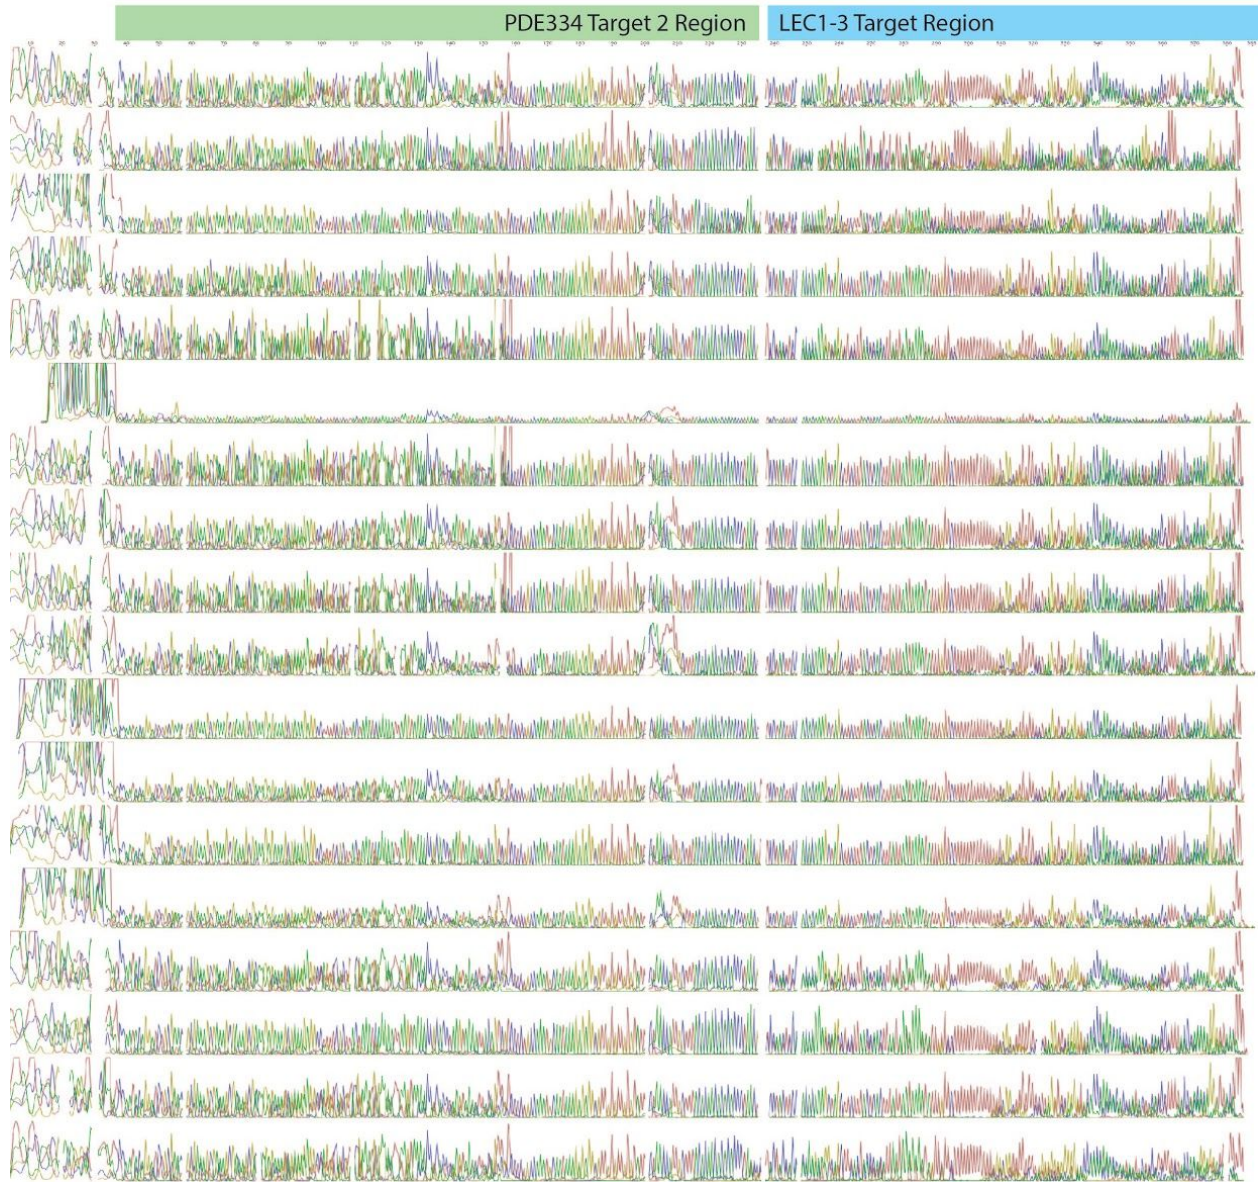

Figure S2: Continued:

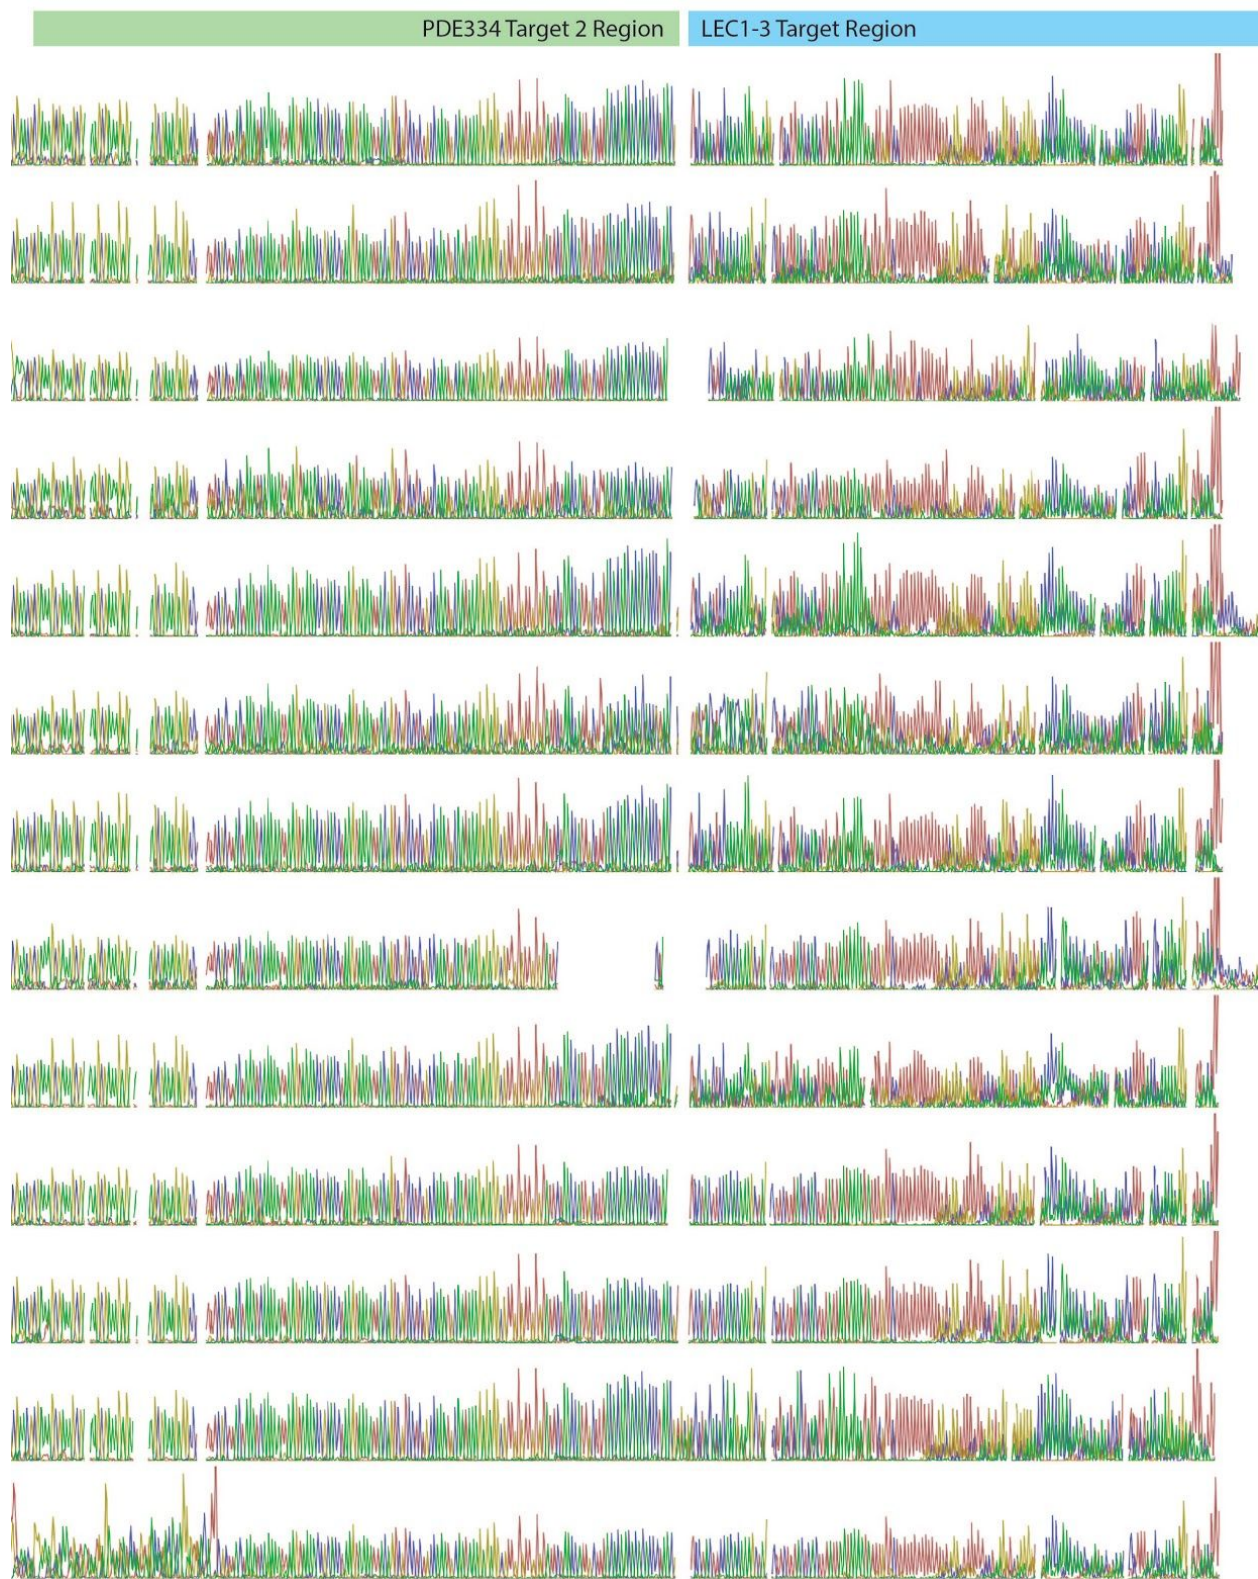

Figure S2. Plants received sgRNAs with targets *PDE334-1*, *PDE334-2* and *LEC1-3*. Translocation junctions detected using primers A and C from Figure S2-B. The chromatograms were aligned using Geneious Alignment. Each chromatogram is from a different primary transformant. Thus, each chromatogram represents independent events. The 10 alleles displayed in Figure 8 were generated with the chromatograms. This orientation could possibly cause increased *LEC1* expression.

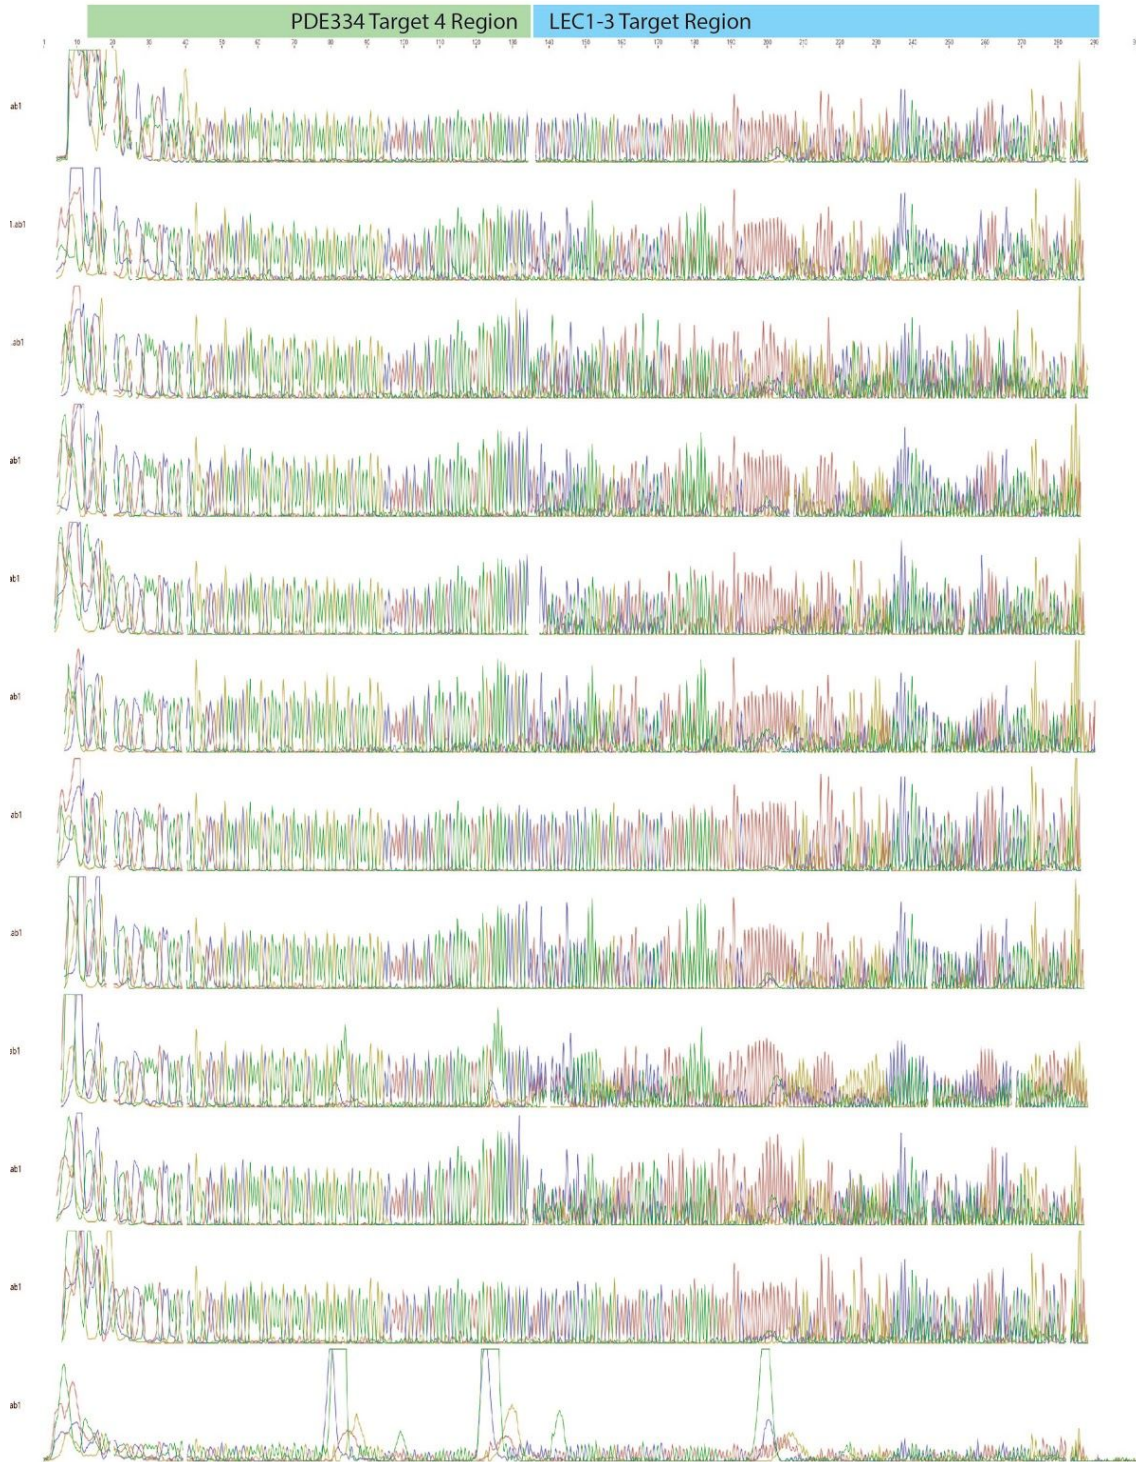

Figure S3. Plants received sgRNAs with targets *PDE334-1*, *PDE334-4* and *LEC1-3*. Translocation junctions detected using primers A and C from Figure S2-B. The chromatograms were aligned using Geneious Alignment. Each chromatogram is from a different primary transformant. Thus, each chromatogram represents an independent event. This orientation could possibly cause increased *LEC1* expression.

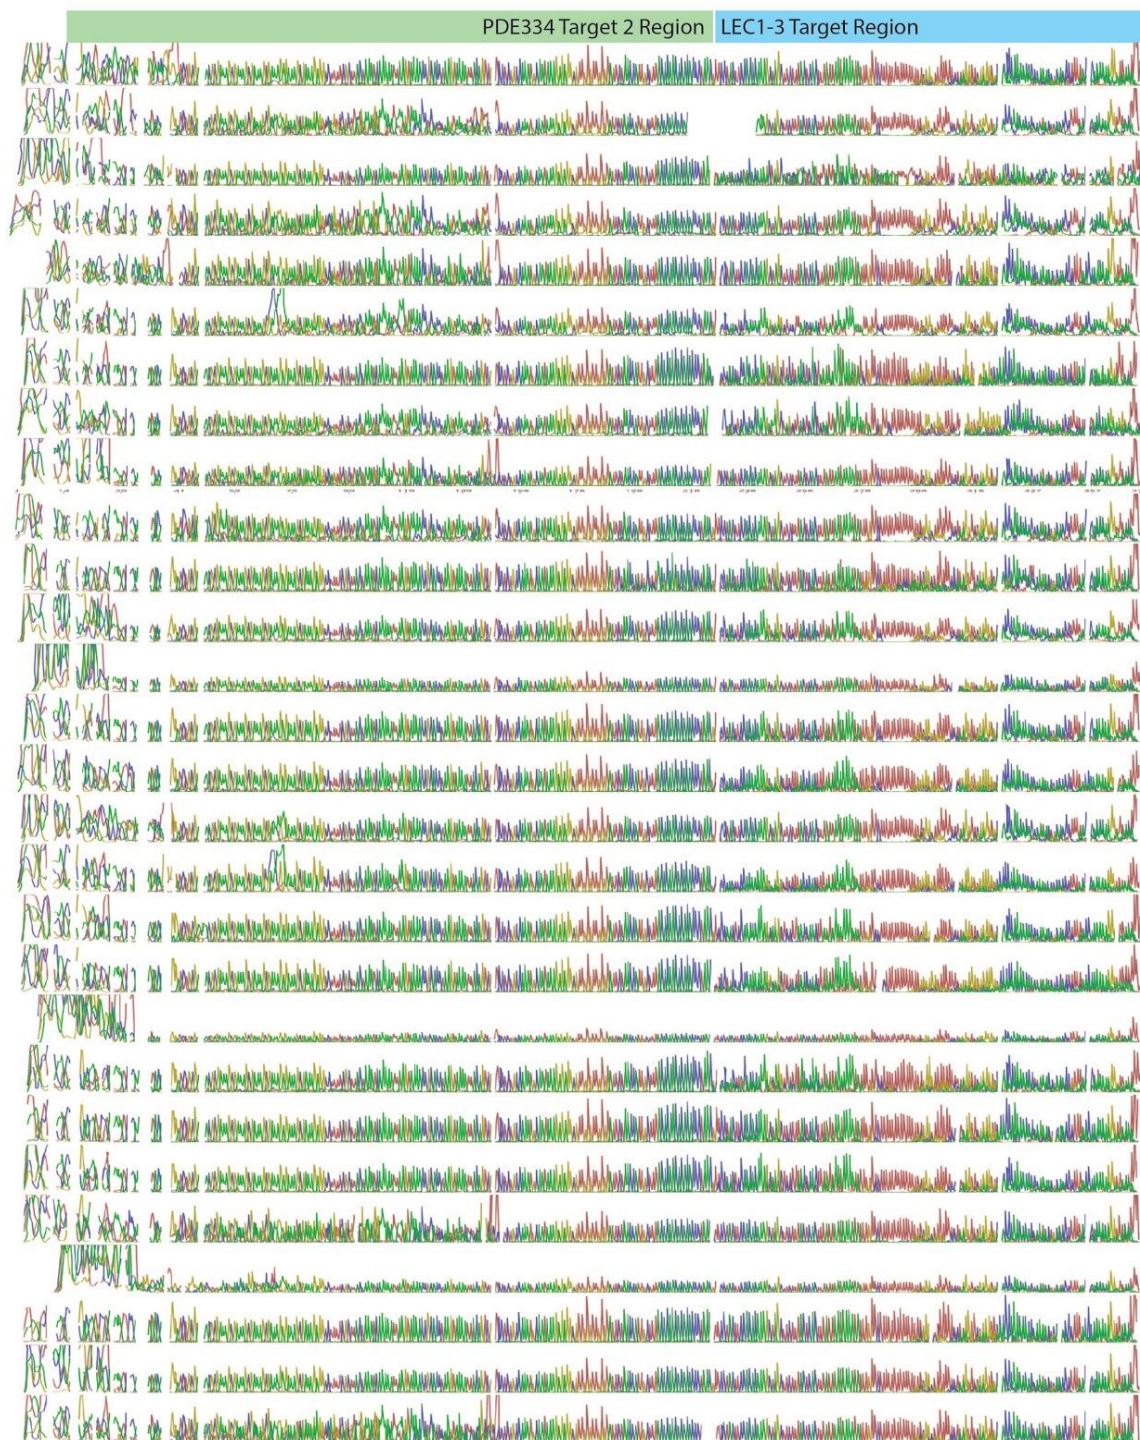

Figure S4. Plants received sgRNAs with targets *PDE334-3*, *PDE334-2* and *LEC1-3*. Translocation junctions detected using primers A and C from Figure S2-B. The chromatograms were aligned using Geneious Alignment. Each chromatogram is from a different primary transformant. Thus, each chromatogram represents an independent event. This orientation could possibly cause increased *LEC1* expression.

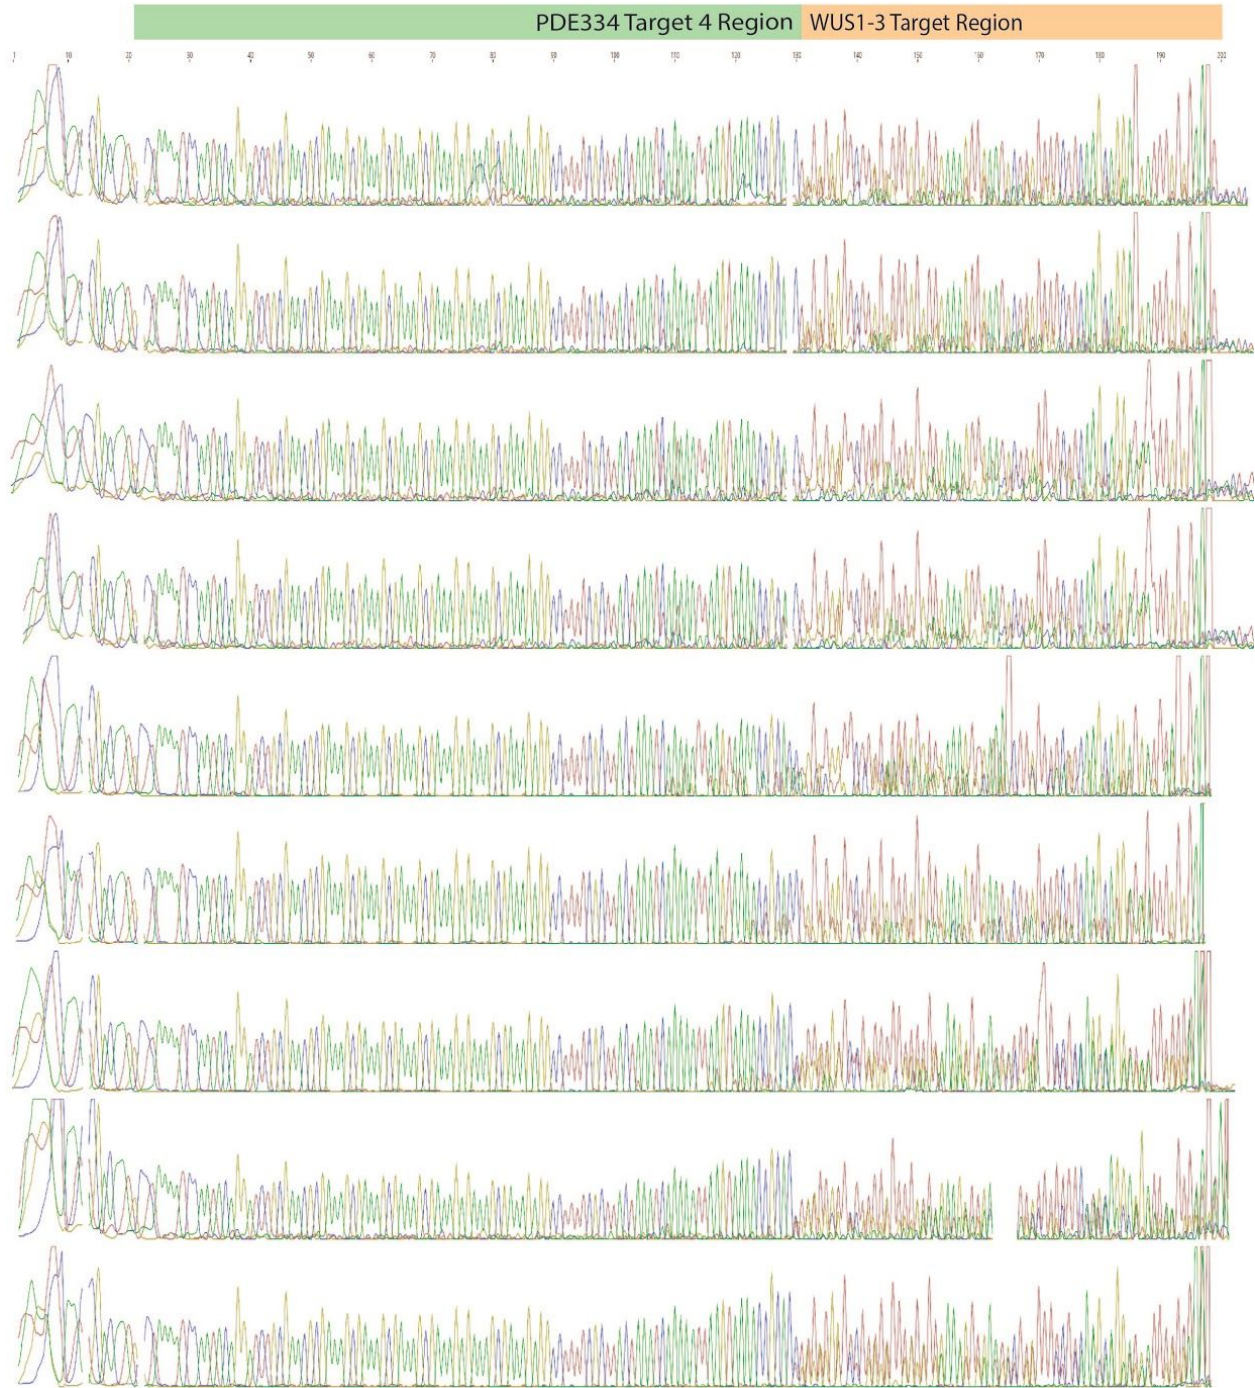

Figure S5. Plants received sgRNAs with targets *PDE334-1*, *PDE334-4* and *Wus1-1*. Translocation junctions detected using primers A and F from Figure S2-B. The chromatograms were aligned using Geneious Alignment. Each chromatogram is from a different primary transformant. Thus, each chromatogram represents an independent event. This orientation is not expected to increase *WUS1* expression.



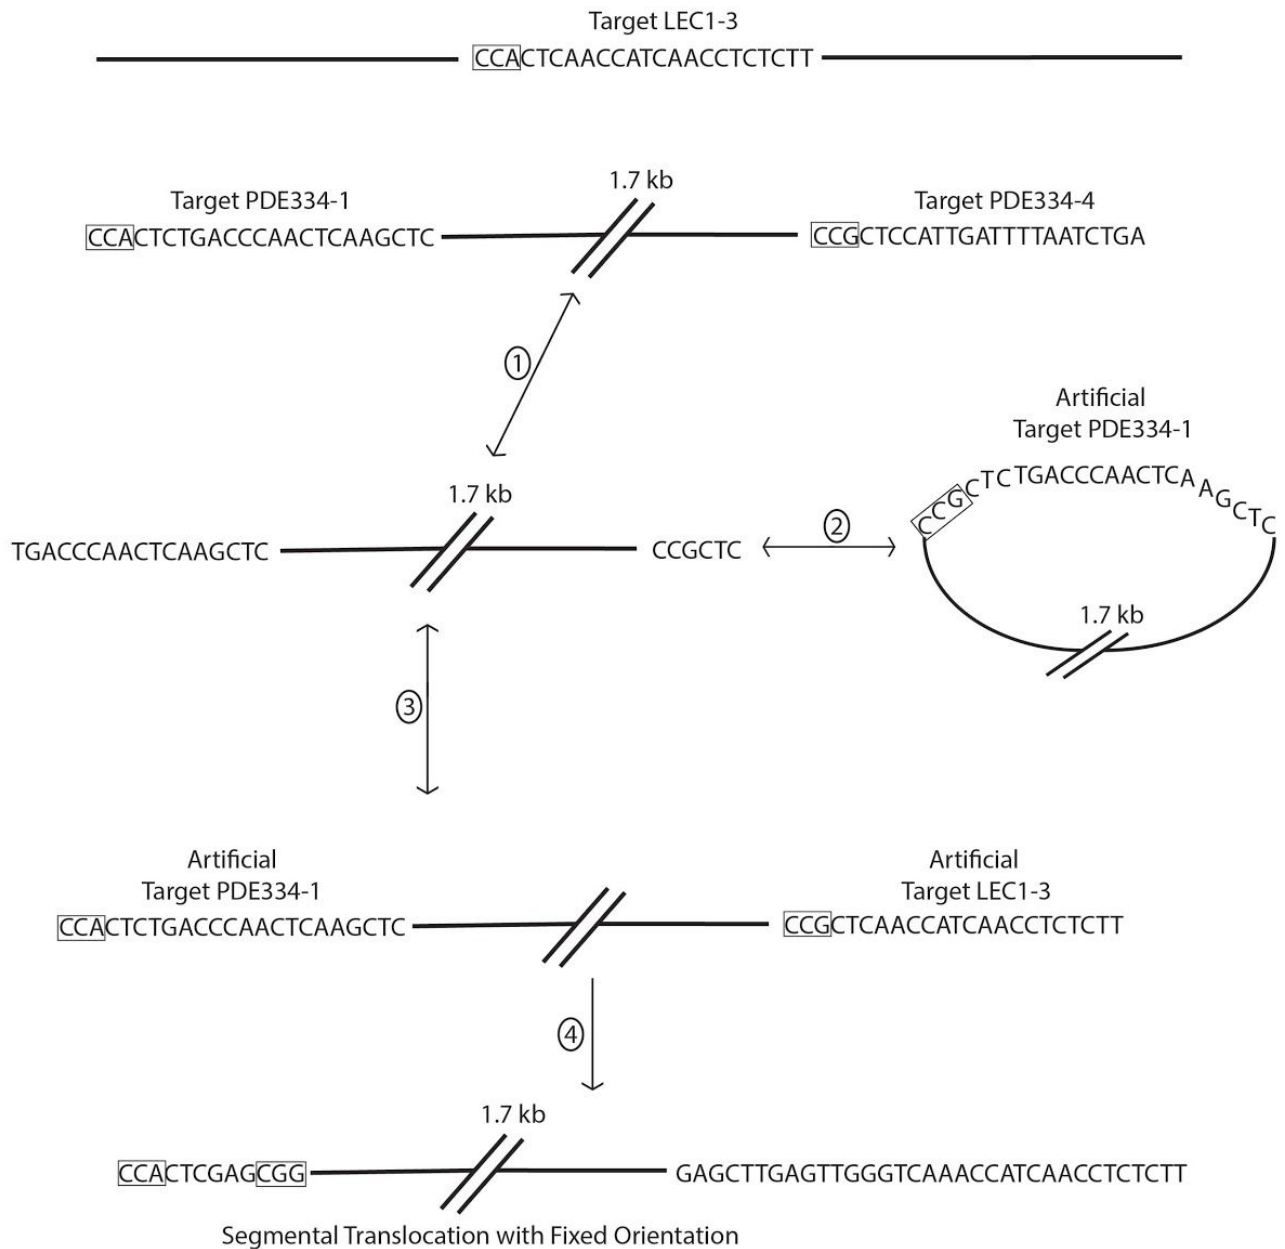

Figure S6. Example of recutting perfect junctions in attempt to control translocation orientation. Step #1 excises the segment. Step #2 is putative circularization of the segment, which reforms the PDE334-1 target sequence, which would be re-cut to form the linear fragment. Step #3 is a translocation of the linear segment into the original cut LEC1-3 locus. Step #4 forms an inversion of the inserted segment, and the resulting DNA contains no Cas9 targets. However, this approach made no detectable difference in translocation orientation or frequency.

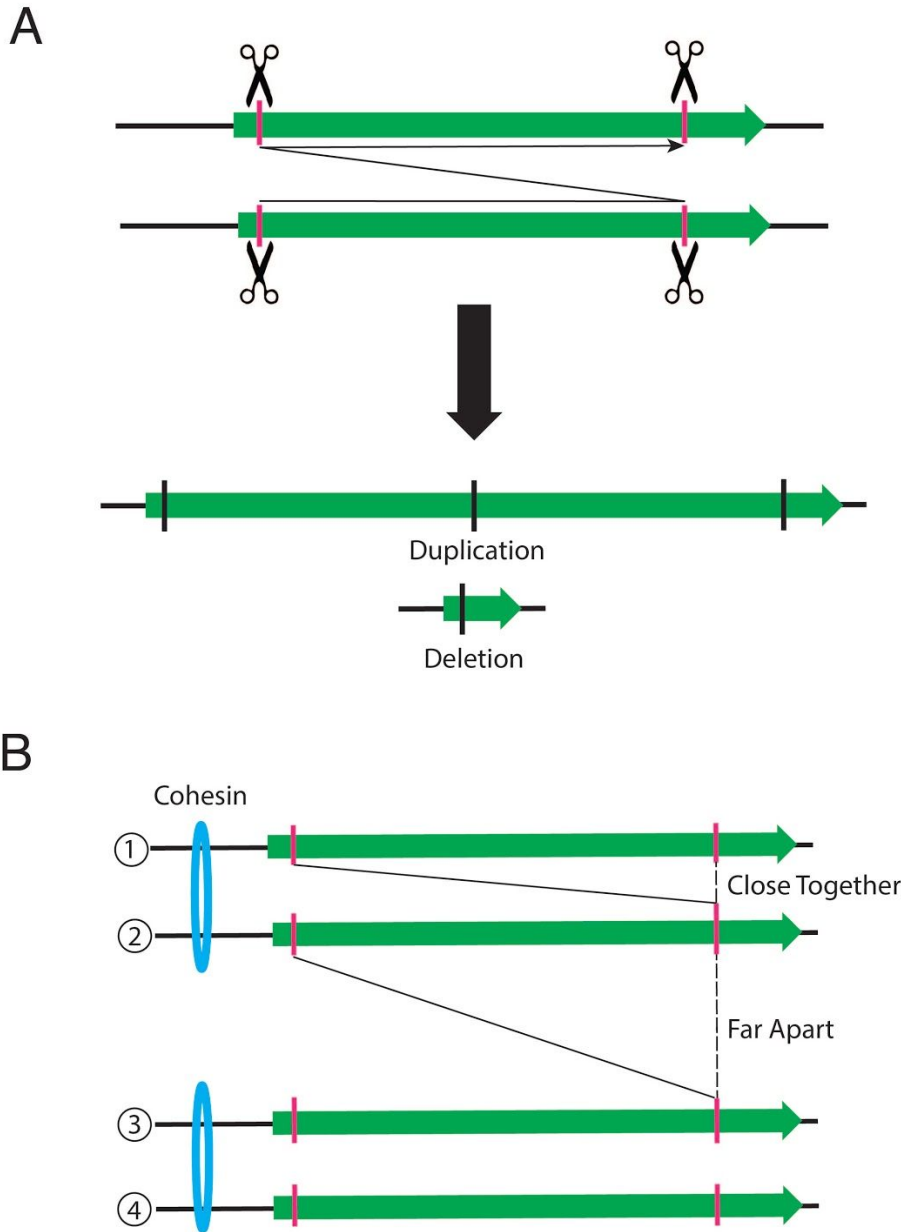

Figure S7. A. Simple translocations between homologs in G1 phase of the cell cycle result in a duplication and a deletion allele. There is no longer a Wild Type allele. B. The products of a simple translocation during G2 phase of the cell cycle depends on which chromatids are involved in the translocation. If a translocation occurs between chromatid #1 and chromatid #2 (sister chromatids), the duplication and deletion will move into separate cell lineages, as hypothesized to have occurred in Line #24 (Figure 4). If a translocation occurs between

chromatid #2 and a deletion in chromatid #3 (non-sister chromatids), the duplication and deletion alleles can possibly go to the same daughter cell. Translocations between sister chromatids are hypothesized to occur most frequently due to the close physical proximity between sister chromatids.

**Table S1. CRISPR-Cas9 targets**

| Target   | Target gene, chromosomal coordinates (TAIR10) | gRNA target + PAM       | Construct Backbone | gRNA                    | Strategy                       |
|----------|-----------------------------------------------|-------------------------|--------------------|-------------------------|--------------------------------|
| BRI1     | At4g39400, Chr4:18326878                      | TTGGGTCATAACGATATCTCTGG | RC9 <sup>1</sup>   | ProU6-26 + gRNA         | Synthetic activation           |
| NG1      | Intergenic, Chr2:13228605                     | GGCGGCGTTCATGGCGTCACCGG | RC9 in pPLV02      | (ProU6-26 + gRNA)*3     | One vector                     |
| NG2      | Intergenic, Chr3:16075544                     | AGGTCTTAAACGAAGATCTACGG |                    |                         |                                |
| NG3      | Intergenic, Chr5:4065824                      | GATAAGATATAGAAGGTGTAGGG |                    |                         |                                |
| CH1-1    | At1G44446, Chr1:16851141                      | TTTTCTTTTAGAGGGGAAGGGGG | RC9 in pEG302v2    | (ProU6-26 + gRNA)*2     | One vector                     |
| CH1-2    | At1G44446, Chr1:16848808                      | ACGTGTTGGTGCGCGAGAGGTGG |                    |                         |                                |
| HB21     | At2G18550, Chr2:8051138                       | CTAATGGAGTATAGACATTAGGG | RC9                | ProU6-26 +(tRNA+gRNA)*3 | Synthetic activation           |
| HB40     | At4G36740, Chr4:17315627                      | GTGGAAGAACAAAAGGCTCGAGG |                    |                         |                                |
| HB53     | At5G66700, Chr5:26634496                      | ATCGTTAACCAGATCGATGGAGG |                    |                         |                                |
| PDE334-1 | At4G32260, Chr4:15576459                      | GAGCTTGAGTTGGGTCAGAGTGG | RC9 in pEG302v2    | (ProU6-26 + gRNA)*3     | One vector, 3 sgRNA per vector |
| PDE334-2 | At4G32260, Chr4:15574653                      | GTAATCTCTTTGGAGACGAATGG |                    |                         |                                |
| PDE334-3 | At4G32260, Chr4:15576497                      | CATGGGAAGAGGATGAGGAAGGG |                    |                         |                                |
| PDE334-4 | At4G32260, Chr4:15574747                      | TCAGATTAATCAATGGAGCGG   |                    |                         |                                |
| RABE1B-1 | At4G20360, Chr4:10990031                      | CCGAAATCGCCATGGGAAGATGG |                    |                         |                                |
| RABE1B-2 | At4G20360, Chr4:10988071                      | AGATCAATGGCCGATGGAGAAGG |                    |                         |                                |
| RABE1B-3 | At4G20360, Chr4:10988068                      | TCAATGGCCGATGGAGAAGGAGG |                    |                         |                                |
| WUS1-1   | At2G17950, Chr2:7810727                       | AATAAGATCAAGACTTAGAGAGG |                    |                         |                                |
| LEC1-3   | At1G21970, Chr1:7729658                       | AAGAGAGGTTGATGGTTGAGTGG |                    |                         |                                |
| LEC1-1   | At1G21970, Chr1:7724042                       | TGACGCCGTTAGAAAGCGTACGG |                    |                         |                                |
| LEC1-2   | At1G21970, Chr1:7732513                       | CCTCAAAGAGTAGTAGGAACAGG | RC9 in pEG302v2    | (ProU6-26 + gRNA)*2     | One vector                     |

<sup>1</sup>RC9 = proRPS5A-Cas9

**Table S2.** Summary of mutation efficiencies in T1 and T2 plants

| Target | Gene target, Coordinates on TAIR10 | Phenotype (T1) <sup>1</sup> |      | Mutation rate by sequencing |      |    |                      |                            |      |     |
|--------|------------------------------------|-----------------------------|------|-----------------------------|------|----|----------------------|----------------------------|------|-----|
|        |                                    |                             |      | Leaf <sup>2</sup> (T1)      |      |    |                      | Germline <sup>3</sup> (T2) |      |     |
|        |                                    | Biallelic knockout trait    | Rate |                             | Test |    | Control <sup>3</sup> |                            | % n  | % n |
| %      | n                                  |                             | %    | n                           | %    | n  |                      |                            |      |     |
| BRI1   | <i>At4g39400</i> , Chr4:18326878   | Dwarf                       | 41.2 | 97                          | ND   |    |                      |                            |      |     |
| NG1    | Intergenic, Chr2:13228605          | None                        | N/A  |                             | 99.1 | 18 | 0.6                  | 1                          | 90.9 | 11  |
| NG2    | Intergenic, Chr3:16075544          |                             |      |                             | 32.4 | 12 | 0.5                  | 1                          | 31.5 | 9   |
| NG3    | Intergenic, Chr5:4065824           |                             |      |                             | 96.8 | 18 | 1.1                  | 1                          | 88.9 | 10  |
| CH1-I  | <i>At1G44446</i> , Chr1:16851141   | Yellow leaf                 | 45.7 | 35                          | 45.2 | 31 | 2.0                  | 1                          | ND   |     |
| CH1-II | <i>At1G44446</i> , Chr1:16848808   |                             |      |                             | 55   | 31 | 1.6                  | 1                          |      |     |
| HB21   | <i>At2G18550</i> , Chr2:8051138    | Unknown                     | N/A  |                             | 33   | 45 | 0                    | 1                          | ND   |     |
| HB40   | <i>At4G36740</i> , Chr4:17315627   |                             |      |                             | 56   | 43 | 0                    | 1                          |      |     |
| HB53   | <i>At5G66700</i> , Chr5:26634496   |                             |      |                             | 60   | 46 | 0                    | 1                          |      |     |

1: T1=primary transformant from flower dip, T2=selfed progeny of T1

2: Illumina Ampliseq from T1 plant

3: Sanger sequencing of amplicon from Cas9-negative T2

4: Wild-type leaf mutation rate in protospacer; i.e. noise.

n = Number of plants. All plants are primary transformants, except the control.

ND = no data

N/A = not applicable

**Table S3.** Number of germline mutations in T2 plants following targeting of Cas9 to three intergenic targets.

| T1 ID#                    | 21  | 22  | 26  | 27  | 36  | 38  | 41  | 42  | 43  | 47  | 57  | Average (%) |
|---------------------------|-----|-----|-----|-----|-----|-----|-----|-----|-----|-----|-----|-------------|
| # Cas9-Negative T2 Plants | 3   | 1   | 1   | 4   | 1   | 1   | 3   | 3   | 1   | 1   | 3   | 2.3         |
| NG1*                      | 6/6 | 2/2 | 0/2 | 6/6 | 2/2 | 2/2 | 6/6 | 4/4 | 2/2 | 2/2 | 6/6 | 90.9        |
| NG2*                      | N/A | 0/2 | 0/2 | 3/6 | 0/2 | N/A | 0/4 | 4/6 | 2/2 | 0/2 | 4/6 | 31.5        |
| NG3*                      | N/A | 2/2 | 2/2 | 8/8 | 2/2 | 0/2 | 6/6 | 4/4 | 2/2 | 2/2 | 4/4 | 88.9        |

\*Number of mutated alleles out of the total number of alleles tested.

**Table S4.** Phenotypic and PCR product classes of *CH1* CRISPR-Cas9 transgenic Arabidopsis

| <b>T2 family</b> | <b>Number of individuals</b> | <b>Phenotype</b> | <b>Duplication</b> | <b>Deletion</b> |
|------------------|------------------------------|------------------|--------------------|-----------------|
| 2                | 4                            | Wild type        | -                  | -               |
| 3                | 3                            | Pale yellow      | -                  | -               |
| 6                | 6                            | Pale yellow      | -                  | +               |
| 6                | 1                            | Pale yellow      | -                  | -               |
| 9                | 11                           | Pale yellow      | -                  | +               |
| 10               | 1                            | Pale yellow      | -                  | -               |
| 10               | 6                            | Wild type        | -                  | -               |
| 11               | 1                            | Wild type        | +                  | +               |
| 11               | 1                            | Wild type        | -                  | +               |
| 11               | 5                            | Wild type        | -                  | -               |
| 12               | 7                            | Wild type        | -                  | -               |
| 13               | 1                            | Pale yellow      | +                  | +               |
| 13               | 1                            | Pale yellow      | +                  | -               |
| 13               | 1                            | Pale yellow      | -                  | -               |
| 13               | 3                            | Wild type        | -                  | -               |
| 16               | 2                            | Pale yellow      | -                  | -               |
| 16               | 5                            | Wild type        | -                  | -               |
| 19               | 2                            | Pale yellow      | +                  | +               |
| 19               | 1                            | Pale yellow      | -                  | +               |
| 19               | 1                            | Pale yellow      | -                  | -               |
| 19               | 3                            | Wild type        | -                  | -               |
| 20               | 4                            | Pale yellow      | -                  | +               |
| 20               | 2                            | Wild type        | +                  | +               |
| 20               | 1                            | Wild type        | -                  | +               |
| 21               | 1                            | Pale yellow      | -                  | +               |
| 21               | 4                            | Wild type        | -                  | +               |
| 22               | 3                            | Pale yellow      | +                  | +               |
| 22               | 1                            | Wild type        | -                  | +               |
| 22               | 1                            | Wild type        | -                  | -               |
| 23               | 2                            | Wild type        | +                  | +               |
| 23               | 1                            | Wild type        | +                  | -               |
| 23               | 4                            | Wild type        | -                  | -               |
| 24               | 6                            | Pale yellow      | +                  | -               |

|    |   |             |   |   |
|----|---|-------------|---|---|
| 24 | 6 | Pale yellow | - | - |
| 24 | 1 | Wild type   | + | - |
| 25 | 1 | Pale yellow | + | - |
| 25 | 1 | Pale yellow | - | - |
| 25 | 1 | Wild type   | + | + |
| 25 | 4 | Wild type   | - | - |
| 26 | 4 | Pale yellow | + | + |
| 26 | 1 | Pale yellow | - | + |
| 26 | 1 | Pale yellow | - | - |
| 27 | 2 | Pale yellow | - | - |
| 27 | 5 | Wild type   | - | - |
| 28 | 1 | Wild type   | + | + |
| 28 | 6 | Wild type   | - | - |
| 29 | 1 | Pale yellow | - | - |
| 29 | 2 | Wild type   | + | - |
| 29 | 3 | Wild type   | - | - |
| 30 | 1 | Pale yellow | - | - |
| 30 | 4 | Wild type   | + | + |
| 30 | 1 | Wild type   | + | - |
| 30 | 1 | Wild type   | - | + |
| 31 | 1 | Chimeric    | + | + |
| 31 | 1 | Pale yellow | - | - |
| 33 | 1 | Wild type   | + | + |
| 33 | 1 | Wild type   | - | + |
| 33 | 5 | Wild type   | - | - |
| 34 | 2 | Wild type   | - | + |
| 34 | 5 | Wild type   | - | - |
| 35 | 3 | Wild type   | + | + |
| 35 | 2 | Wild type   | + | - |
| 35 | 2 | Wild type   | - | - |



**Table S5.** PCR for translocations between NG1, NG2 and NG3

|            |                         | PCR for Translocation Detection (+ or -) |       |       |       |       |       |           |       |       |               |       |       |
|------------|-------------------------|------------------------------------------|-------|-------|-------|-------|-------|-----------|-------|-------|---------------|-------|-------|
|            |                         | Monocentric                              |       |       |       |       |       | Dicentric |       |       | No Centromere |       |       |
|            | Primers                 | 2F,3R                                    | 3F,2R | 2R,5R | 3R,5R | 2F,5F | 3F,5F | 2F,5R     | 2F,3F | 3F,5R | 5F,2R         | 5F,3R | 2R,3R |
|            | Expected Band Size (bp) | 446                                      | 530   | 687   | 682   | 227   | 306   | 368       | 211   | 447   | 546           | 541   | 765   |
| T1 plant # | PCR for cas9 (+ or -)   |                                          |       |       |       |       |       |           |       |       |               |       |       |
| 1          | +                       | -                                        | -     | -     | -     | -     | -     | -         | -     | -     | -             | -     | -     |
| 2          | +                       | -                                        | -     | -     | -     | -     | -     | -         | -     | -     | -             | -     | -     |
| 9          | +                       | -                                        | -     | -     | -     | -     | -     | -         | -     | -     | -             | -     | -     |
| 10         | +                       | -                                        | -     | -     | -     | -     | -     | -         | -     | -     | -             | -     | -     |
| 12         | +                       | -                                        | -     | -     | -     | -     | -     | -         | -     | -     | -             | -     | -     |
| 13         | +                       | -                                        | -     | -     | -     | -     | -     | -         | -     | -     | -             | -     | -     |
| 14         | +                       | -                                        | -     | -     | -     | -     | -     | -         | -     | -     | -             | -     | -     |
| 17         | +                       | -                                        | -     | -     | -     | -     | -     | -         | -     | -     | -             | -     | -     |
| 20         | +                       | -                                        | -     | -     | -     | -     | -     | -         | -     | -     | -             | -     | -     |
| 21         | +                       |                                          |       | -     | -     | -     | -     | -         | -     | -     | -             | -     | -     |
| 22         | +                       |                                          |       | -     | -     | -     | -     | -         | -     | -     | -             | -     | -     |
| 23         | +                       | -                                        | -     | -     | -     | -     | -     | -         | -     | -     | -             | -     | -     |
| 26         | +                       | -                                        | -     | -     | -     | -     | -     | -         | -     | -     | -             | -     | -     |
| 27         | +                       | -                                        | -     | +     | -     | +     | -     | -         | -     | -     | -             | -     | -     |

|    |   |      |      |      |     |      |      |     |      |      |      |      |     |
|----|---|------|------|------|-----|------|------|-----|------|------|------|------|-----|
| 29 | + | -    | -    | -    | -   | -    | -    | -   | -    | -    | -    | -    | -   |
| 31 | + | -    | -    | -    | -   | -    | -    | -   | -    | -    | -    | -    | -   |
| 32 | + | -    | -    | -    | -   | -    | -    | -   | -    | -    | -    | -    | -   |
| 34 | + | -    | -    | -    | -   | -    | -    | -   | -    | -    | -    | -    | -   |
| 35 | + |      |      | -    | -   | -    | -    | -   | -    | -    | -    | -    | -   |
| 36 | + |      |      | -    | -   | -    | -    | -   | -    | -    | -    | -    | -   |
| 38 | + |      |      | +    | -   | -    | -    | +   | -    | -    | -    | -    | -   |
| 41 | + |      |      | -    | -   | -    | -    | -   | -    | -    | -    | -    | -   |
| 42 | + |      |      |      |     |      |      |     |      | -    | -    |      |     |
| 43 | + |      |      |      |     |      |      |     |      | -    | -    |      |     |
| 47 | + |      |      |      |     |      |      |     |      | -    | -    |      |     |
| 48 | + |      |      |      |     |      |      |     |      | -    | -    |      |     |
| 55 | + |      |      | -    | -   | -    | -    | -   | -    | -    | -    | -    | -   |
| 56 | + |      |      | -    | -   | -    | -    | -   | -    | -    | -    | -    | -   |
| 57 | + |      |      | -    |     |      |      |     |      |      |      |      |     |
| 60 | + |      |      | -    | -   | -    | -    | -   | -    | -    | -    | -    | -   |
| 61 | + |      |      | -    | -   | -    | -    | -   | -    | -    | -    | -    | -   |
| 62 | + |      |      | -    | -   | -    | -    | -   | -    | -    | -    | -    | -   |
| 63 | + |      |      | -    | -   | -    | -    | -   | -    | -    | -    | -    | -   |
| 66 | + |      |      | -    | -   | -    | -    | -   | -    | -    | -    | -    | -   |
| 67 | + |      |      | -    | -   | -    | -    | -   | -    | -    | -    | -    | -   |
|    |   | 0/16 | 0/16 | 2/31 | 0/3 | 1/30 | 0/30 | 1/3 | 0/30 | 0/34 | 0/34 | 0/30 | 0/3 |







**Table S7.** List of oligonucleotides

|            |                           |                |
|------------|---------------------------|----------------|
| CH1-I_f    | attgGGCGGCGTTCATGGCGTCAC  | sgRNA building |
| CH1-I_r    | aaacGTGACGCCATGAACGCCGCC  | sgRNA building |
| CH1-II_f   | attgAGGTCTTAAACGAAGATCTA  | sgRNA building |
| CH1-II_r   | aaacTAGATCTTCGTTTAAAGACCT | sgRNA building |
| NG1_f      | attgGATAAGATATAGAAGGTGTA  | sgRNA building |
| NG1_r      | aaacTACACCTTCTATATCTTATC  | sgRNA building |
| NG2_f      | attgGTTTCTTTTAGAGGGGAAGG  | sgRNA building |
| NG2_r      | aaacCCTTCCCCTCTAAAAGAAAC  | sgRNA building |
| NG3_f      | attgGCGTGTTGGTGC GCGAGAGG | sgRNA building |
| NG3_r      | aaacCCTCTCGCGCACCAACACGC  | sgRNA building |
| LEC1-1_f   | attgTGACGCCGTTAGAAAGCGTA  | sgRNA building |
| LEC1-1_r   | aaacTACGCTTTCTAACGGCGTCA  | sgRNA building |
| LEC1-2_f   | attgCCTCAAAGAGTAGTAGGAAC  | sgRNA building |
| LEC1-2_r   | aaacGTTCTACTACTCTTTGAGG   | sgRNA building |
| LEC1-3_f   | attgAAGAGAGGTTGATGGTTGAG  | sgRNA building |
| LEC1-3_r   | aaacCTCAACCATCAACCTCTCTT  | sgRNA building |
| PDE334-1_f | attgGAGCTTGAGTTGGGTCAGAG  | sgRNA building |
| PDE334-1_r | aaacCTCTGACCCA ACTCAAGCTC | sgRNA building |
| PDE334-2_f | attgGTAATCTCTTTGGAGACGAA  | sgRNA building |
| PDE334-2_r | aaacTTCGTCTCCAAAGAGATTAC  | sgRNA building |
| PDE334-3_f | attgCATGGGAAGAGGATGAGGAA  | sgRNA building |
| PDE334-3_r | aaacTCCTCATCCTCTTCCCATG   | sgRNA building |
| PDE334-4_f | attgTCAGATTAAAATCAATGGAG  | sgRNA building |
| PDE334-4_r | aaacCTCCATTGATTTTAAATCTGA | sgRNA building |
| RABE1B-1_f | attgCCGAAATCGCCATGGGAAGA  | sgRNA building |
| RABE1B-1_r | aaacTCTTCCCATGGCGATTTCCGG | sgRNA building |
| RABE1B-2_f | attgAGATCAATGGCCGATGGAGA  | sgRNA building |

|                |                                                                |                                          |
|----------------|----------------------------------------------------------------|------------------------------------------|
| RABE1B-2_r     | aaacTCTCCATCGGCCATTGATCT                                       | sgRNA building                           |
| RABE1B-3_f     | attgTCAATGGCCGATGGAGAAGG                                       | sgRNA building                           |
| RABE1B-3_r     | aaacCCTTCTCCATCGGCCATTGA                                       | sgRNA building                           |
| WUS1-1_f       | attgAATAAGATCAAGACTTAGAG                                       | sgRNA building                           |
| WUS1-1_r       | aaacCTCTAAGTCTTGATCTTATT                                       | sgRNA building                           |
| RPS5aPro_fwd   | TCTAGTTGGAATGGGTCCATAATCGTGAGTAGATATATTACTC                    | for gibson making<br>RPS5a-Cas9          |
| RPS5aPro_rev   | cttatccatGGCTGTGGTGAGAGAAAC                                    | for gibson making<br>RPS5a-Cas9          |
| Cas9HP_fwd     | ccacagccATGGATAAGAAGTACTCTATCGG                                | for gibson making<br>RPS5a-Cas9          |
| Cas9HP_rev     | ccttatggagttgggttTCAAACCTTCCTCTTCTTC                           | for gibson making<br>RPS5a-Cas9          |
| 2x_BsaI_f      | attgGGGTCTTCGAGAAGACCT                                         | BsaI palindrome for<br>pEn_Comaira       |
| 2x_BsaI_r      | aaacAGGTCTTCTCGAAGACCC                                         | BsaI palindrome for<br>pEn_Comaira       |
| U6g_1/4_1f     | ggggacaagtttgtacaaaaaagcaggcttaCTTTTTTCTTCTTCTTCGTTCA<br>TACAG | U6:gRNA cassette with<br>attB1/4 tags    |
| U6g_1/4_1r     | ggggacaactttgtatagaaaagttgggtgGGTCTAGAAAAAAGCACCGACTC          | U6:gRNA cassette with<br>attB1/4 tags    |
| U6g_4r/3r_1f   | ggggacaacttttctatacaaaagttgtaCTTTTTTCTTCTTCTTCGTTTCATAC<br>AG  | U6:gRNA cassette with<br>attB4r/3r tags  |
| U6g_4r/3r_1r   | ggggacaactttattatacaaaagttgtaGGTCTAGAAAAAAGCACCGACTC           | U6:gRNA cassette with<br>attB4r/3r tags  |
| U6g_3/2_1f     | ggggacaactttgtataataaagttgtaCTTTTTTCTTCTTCTTCGTTTCATAC<br>AG   | U6:gRNA cassette with<br>attB3/2 tags    |
| U6g_3/2_1r     | ggggaccactttgtacaagaagctgggtgGGTCTAGAAAAAAGCACCGACTC           | U6:gRNA cassette with<br>attB3/2 tags    |
| RC9_3/2_f      | ggggacaactttgtataataaagTTGTAAACGACGCCAGTGAATTG                 | RPS5a:Cas9 cassette<br>with attB3/2 tags |
| RC9_3/2_r      | ggggaccactttgtacaagaagctgggttGCCAAGCTCGGAATTAACCC              | RPS5a:Cas9 cassette<br>with attB3/2 tags |
| nos:kan_1/4_1f | ggggacaagtttgtacaaaaaagcaggcttaACGTATGACCCCCCGCAT              | nos:kanR cassette with<br>attB1/4 tags   |
| nos.kan_1/4_1r | ggggacaactttgtatagaaaagttgggtgACCGTCACCGACTTGAGCCA             | nos:kanR cassette with<br>attB1/4 tags   |
| Ampliseq NG2_f | acactctttccctacacgacgctcttGATCTTATGTCCGTGTAGATGCAAAC           |                                          |

|                              |                                                                |               |
|------------------------------|----------------------------------------------------------------|---------------|
| Ampliseq NG2_r               | ctggagttcagacgtgtgctcttccgatctCATAGGCCAAGATCAATAGTCAAC         |               |
| Ampliseq NG3_f               | acactctttccctacacgacgctcttCCGATCTCTATTTCCAACGCTTCTTCT<br>AATCG |               |
| Ampliseq NG3_r               | ctggagttcagacgtgtgctcttccgatctCTAGGATGTAGCAAACCACACAT<br>ATC   |               |
| Ampliseq NG5_f               | acactctttccctacacgacgctcttCCGATCTTTCAAGGTAAGCAAATGTTG<br>TGT   |               |
| Ampliseq NG5_r               | ctggagttcagacgtgtgctcttccgatctAATGATATGAGTGTAATCGAGAA<br>C     |               |
| NG<br>Translocation<br>Arm A | CTGCCTTCATATCAAAAGATTCCAC                                      | See Figure 6B |
| NG<br>Translocation<br>Arm B | CCTAGTTCTTCTATCTAGATA                                          | See Figure 6B |
| NG<br>Translocation<br>Arm C | CTATTTCCAACGCTTCTCTAATCG                                       | See Figure 6B |
| NG<br>Translocation<br>Arm D | GAAACGTTCTCCTCATGTATGCTG                                       | See Figure 6B |
| NG<br>Translocation<br>Arm E | TTTCAAGGTAAGCAAATGTTGTGT                                       | See Figure 6B |
| NG<br>Translocation<br>Arm F | CAAGATTCAAGATTCAGTACTATTC                                      | See Figure 6B |
| LEC1 A                       | ACAAAGTGACTAAGAACATAG                                          | See Figure 4A |
| LEC1 B                       | TGGACAGTTCAGACGCTAATG                                          | See Figure 4A |
| LEC1 C                       | TAGATTACCAGAGATGGATTTTGGTAGC                                   | See Figure 7B |
| PDE334 A                     | GCATTGTGTATTTACGTTTGTAGTGG                                     | See Figure 7B |
| Ampliseq<br>CH1-1_f          | acactctttccctacacgacgctcttccgatctAATACCGCCACGTGTTCAAT          |               |
| Ampliseq<br>CH1-1_r          | ctggagttcagacgtgtgctcttccgatctACTAAACCCATATCGCAAAAACGT         |               |
| Ampliseq<br>CH1-2_f          | acactctttccctacacgacgctcttccgatctACCGAATGTCACTAGACTTTG<br>CT   |               |
| Ampliseq<br>CH1-2_r          | ctggagttcagacgtgtgctcttccgatctGCTGGTGAATAAGGAGCTGC             |               |
| CH1 A                        | ATACAATAAATACCATAGCAC                                          | See Figure 3A |



|           |                              |                                     |
|-----------|------------------------------|-------------------------------------|
| CH1 B     | TGGACAACCAAACCAGGAAA         | See Figure 3A                       |
| CH1 C     | TCCTTTCACGCCCTGTAACC         | See Figure 3A                       |
| CH1 D     | AGAAGCTGAGCTACTAGAGTC        | See Figure 3A                       |
| CH1 E     | TTATGAGACTTCCTCTAACTC        | See Figure 3A                       |
| CH1 F     | AGAAGGCAAAGCACACAGC          | See Figure 3A                       |
| CH1 G     | ACCAGATTAATAACCTACACTTGTCTG  | See Figure 3A                       |
| CH1 H     | GCTGAAGAACTTTCGATTGG         | See Figure 3A                       |
| PDE334 B  | CGTGGTGGAACGTCATAGATTG       | See Figure 7                        |
| PDE334 C  | GCATTGTGTATTTACGTTGTAGTGG    | See Figure 7                        |
| LEC1 E    | CCACATAGCCAATGAGACAAGCC      | See Figure 7                        |
| LEC1 F    | TAGATTACCAGAGATGGATTTTGGTAGC | See Figure 7                        |
| WUS1 E    | CCTAAAATCTCTTTACTACCAGCAAG   | See Figure 7                        |
| WUS1 F    | GATCTGATCGGCTGTTGGTGACC      | See Figure 7                        |
| RABE1B B  | ATTAAGCTAATTACTAGCAACGATTCG  | See Figure 7                        |
| RABE1B Bb | AATTGAATCATAACTACAATCGTAGCC  | See Figure 7; alternate to RABE1B B |
| RABE1B C  | TTTCTTCTAAAGAGATAACATCAC     | See Figure 7                        |

**Table S8.** Knockout frequency for *BR11* in different types of crosses.

| Egg \ Sperm | gRNA-5 | gRNA-2 | gRNA-7 | gRNA-4 | gRNA-8 | gRNA-5 | gRNA-3 |
|-------------|--------|--------|--------|--------|--------|--------|--------|
| Cas9-3      | 0/15   | 0/13   | 0/27   | 0/15   | 2/10   | 0/18   | 0/11   |
| Cas9-4      | 12/15  | 13/24  | 0/39   |        | 7/10   |        | 8/9    |
| Cas9-5      | 0/30   | 0/17   | 0/10   |        | 0/18   |        |        |
